# Supplementary material for: Invariom approach as a new tool in electron density studies of ionic liquids: a model case of 1-butyl-2,3-dimethylimidazolium chloride BDMIM[Cl]
Source: Royal Society of Chemistry journal article supplement (doi:10.1039/c5ra13752g), 2015-01-01
Supplement: c5ra13752g1.pdf [file c5ra13752g1.pdf]

**Supplementary Information for the paper titled “Invariom approach as a new tool in electron density studies of ionic liquids: a case of 1-butyl-2,3-dimethylimidazolium chloride BDMIM[Cl]”**

*by Yulia V. Nelyubina, Alexander A. Korlyukov and Konstantin A. Lyssenko*

**Supplementary Figures:**

**Figure S1.** 3D-distribution of DED around the chloride anion in BDMIM[Cl] as obtained from the conventional multipole refinement; the chloride anion is in the center of the special cluster with a radius of 6 Å. Isosurface of DED equal to  $0.55 \text{ e}\text{\AA}^{-3}$  is shown by red; the negative isosurface (DED is  $-0.2 \text{ e}\text{\AA}^{-3}$ ) is shown by wireframe.

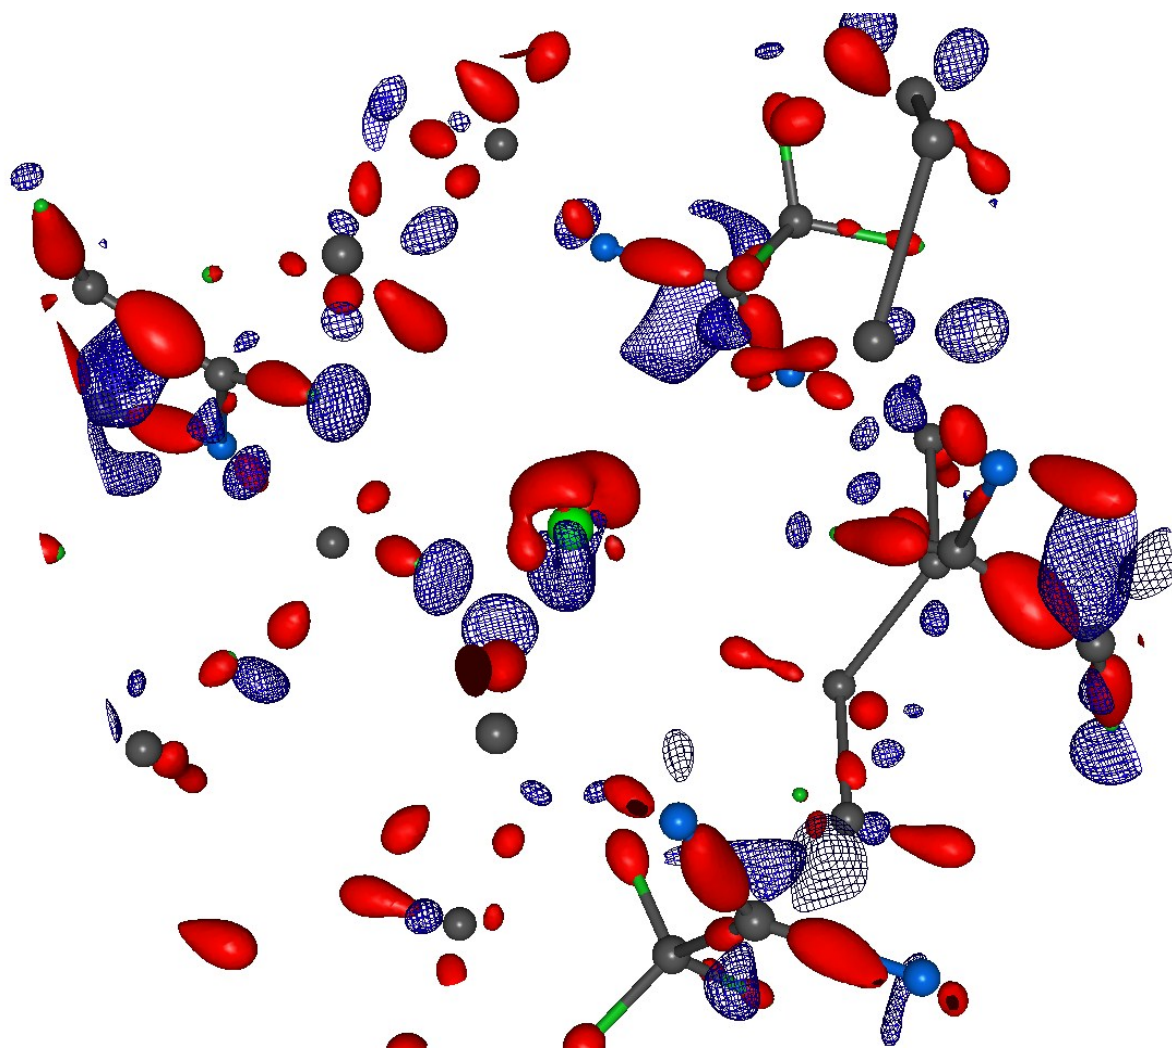

**Figure S2.** Distributions of the experimental DED in the plane of N(1)...C(4) bond paths from the conventional multipole refinement (A) and from the invariom approximation (B). Contours are drawn with  $0.1 \text{ e}\text{\AA}^{-3}$  step, negative ones are dashed. Stacking interactions are depicted as long black dashes, C-H... $\pi$  contacts as short black dashes.

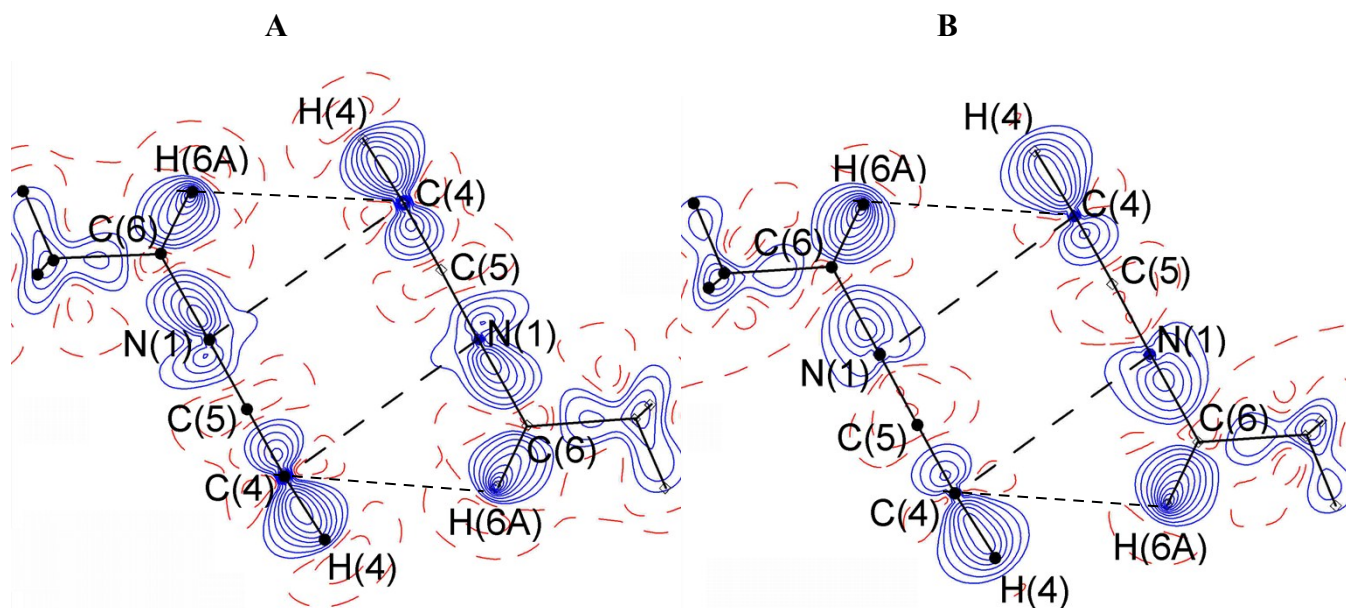

**Figure S3.** Distributions of the experimental DED in the plane of C-H... $\pi$  contact in the ion-pair dimer with no stacking interaction from the conventional multipole refinement (A) and from the invariom approximation (B). Contours are drawn with  $0.1 \text{ e}\text{\AA}^{-3}$  step, negative ones are dashed.

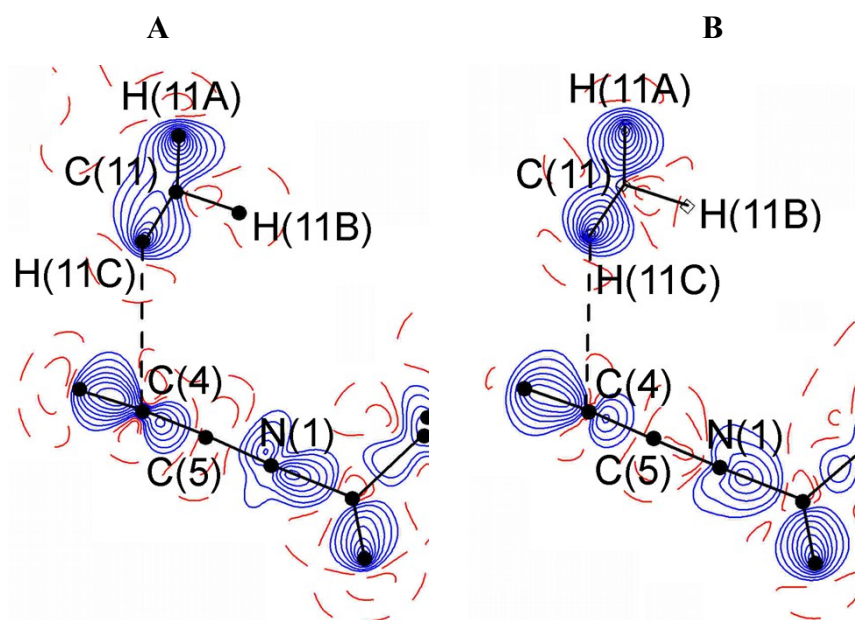

**Figure S4.** Interaction energies (kcal/mol) for H-bonds in BDMIM[Cl] plotted against H...Cl distance (Å), in black, from the conventional multipole refinement (A), the invariom approximation (B) and from periodic quantum chemistry (C).

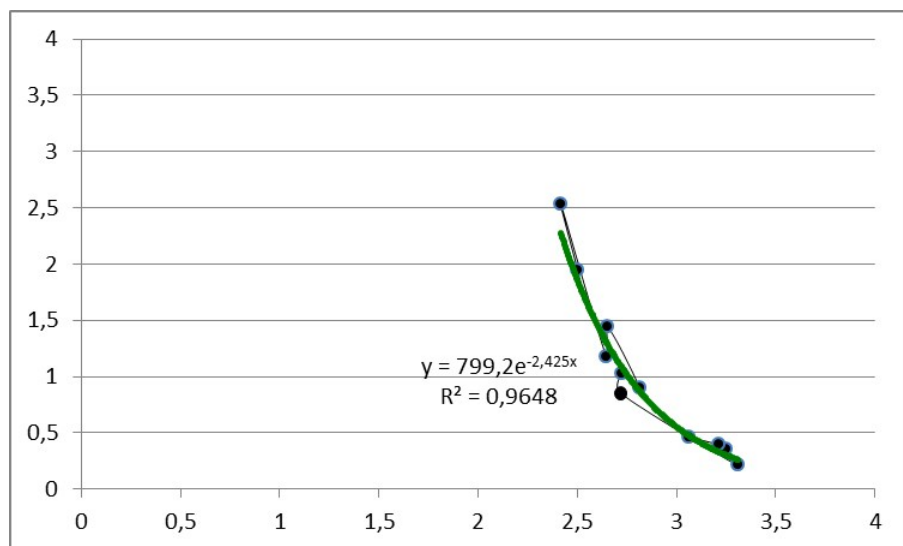

A

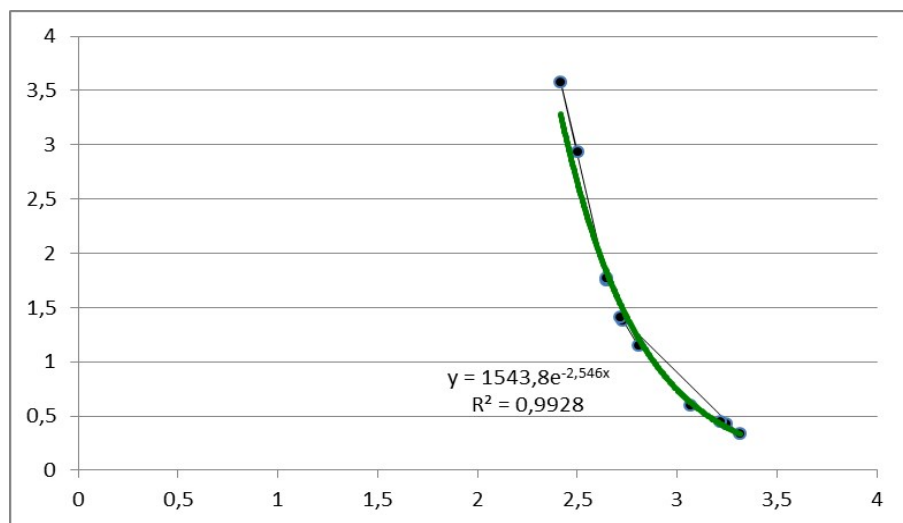

B

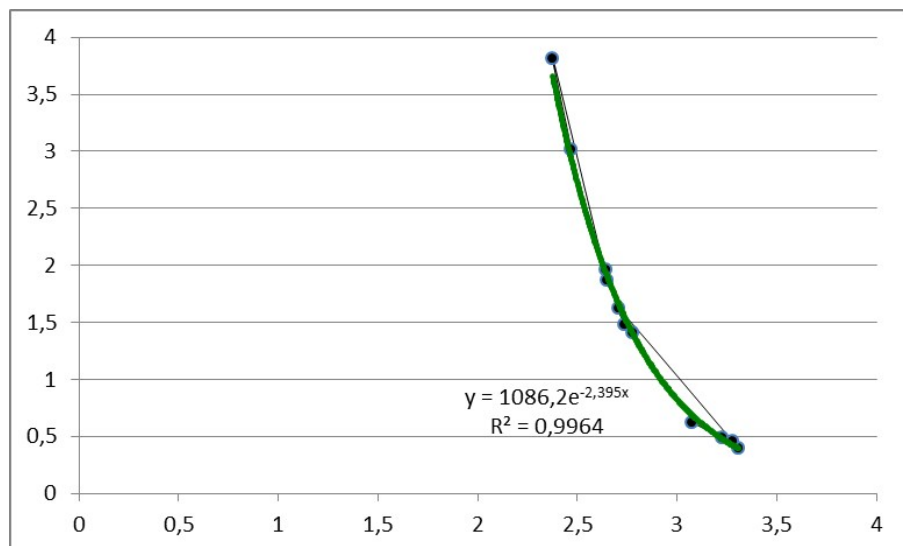

C

**Figure S5.** Interaction energies (kcal/mol) for H-bonds in BDMIM[Cl] plotted against H...Cl distance (Å), in black, from the conventional multipole refinement and periodic quantum chemistry (**A**) and from the invariom approximation and periodic quantum chemistry (**B**).

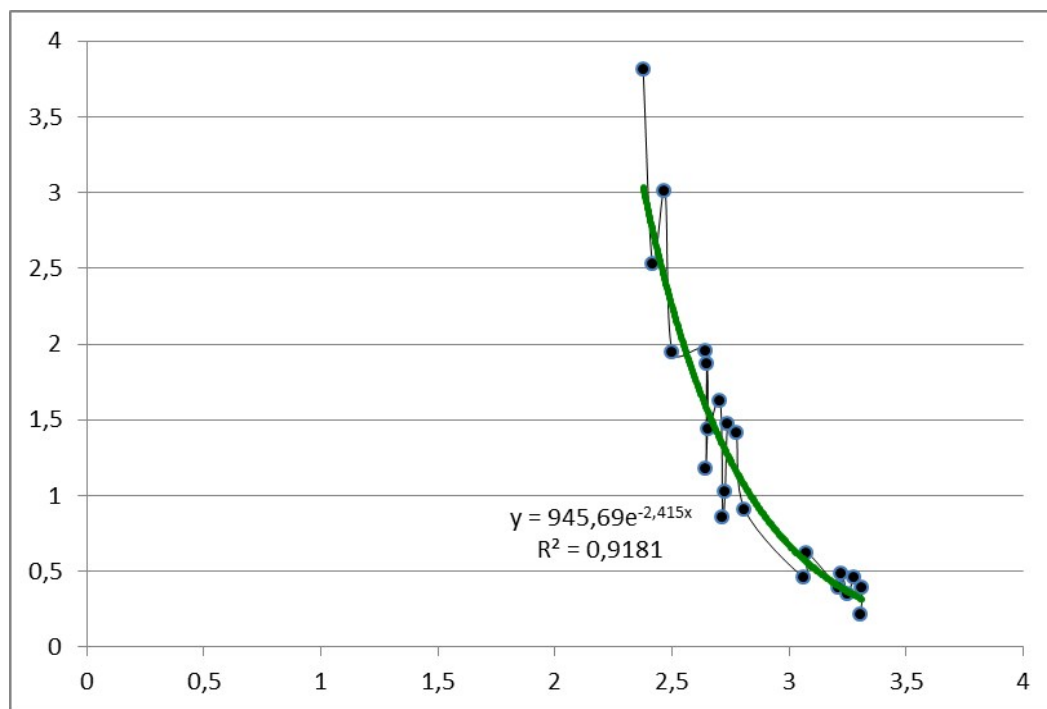

**A**

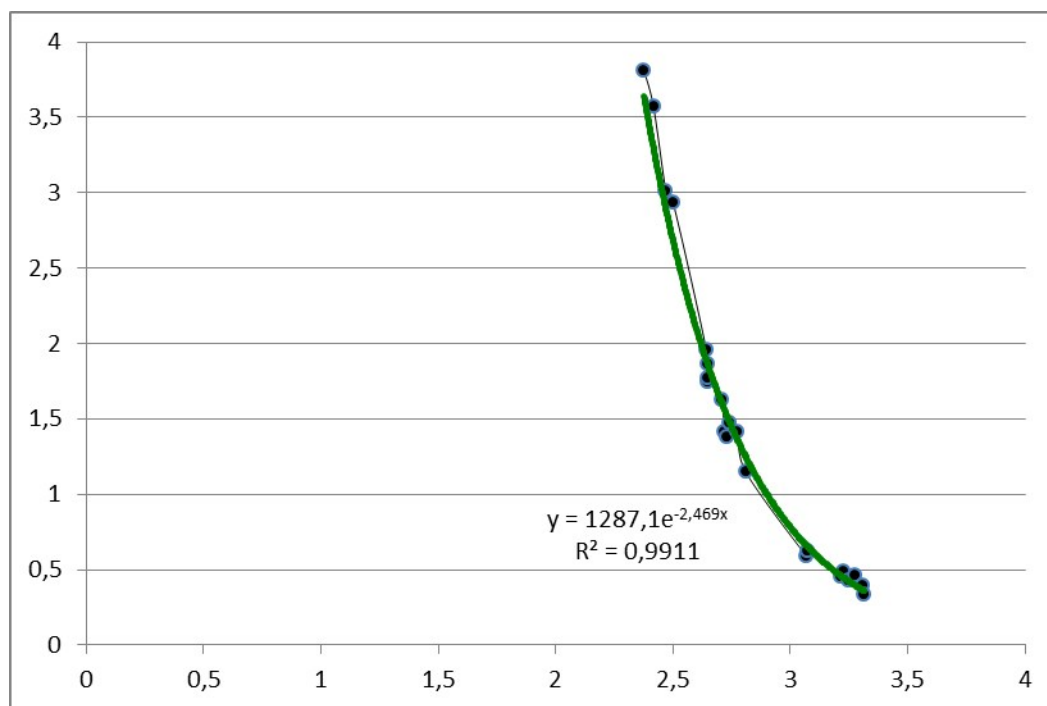

**B**

**Figure S6.** Molecular graph for the ion-pair dimer in BDMIM[Cl] that features stacking interaction (**A**) and the one that does not (**B**); bcp are shown as yellow spheres, rcp as a cyan rhomboid.

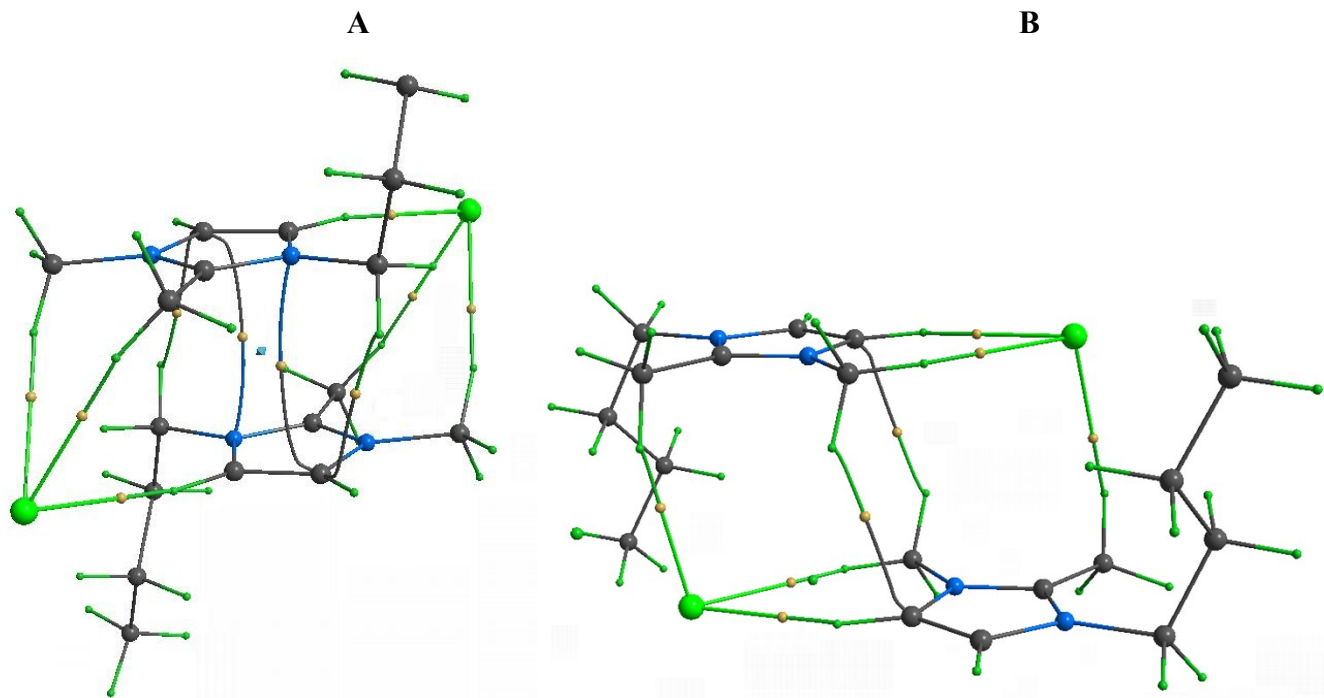

**Supplementary Tables:****Table S1.** Topological parameters of  $\rho(\mathbf{r})$  in bcps for covalent bonds in BDMIM[Cl] from multipole and invariom (in parentheses) modeling of X-ray diffraction data and from periodic quantum chemistry (second entry).

| Bond                   | d, Å <sup>a)</sup> | $\rho(\mathbf{r})$ , eÅ <sup>-3</sup> | $-\nabla^2\rho(\mathbf{r})$ , eÅ <sup>-5</sup> | $\epsilon^b)$ |
|------------------------|--------------------|---------------------------------------|------------------------------------------------|---------------|
| N(1)-C(2)              | 1.3395(7)          | 2.52 (2.29)                           | 25.87 (20.96)                                  | 0.19 (0.23)   |
|                        | 1.350              | 2.28                                  | 23.73                                          | 0.27          |
| C(2)-N(3)              | 1.3388(7)          | 2.54 (2.29)                           | 26.80 (21.30)                                  | 0.21 (0.23)   |
|                        | 1.348              | 2.30                                  | 24.13                                          | 0.21          |
| N(3)-C(4)              | 1.3830(7)          | 2.25 (2.01)                           | 20.88 (15.03)                                  | 0.14 (0.17)   |
|                        | 1.385              | 2.05                                  | 18.49                                          | 0.19          |
| C(4)-C(5)              | 1.3512(8)          | 2.45 (2.26)                           | 25.41 (19.03)                                  | 0.27 (0.32)   |
|                        | 1.366              | 2.25                                  | 23.57                                          | 0.29          |
| C(5)-N(1)              | 1.3850(7)          | 2.22 (2.01)                           | 19.90 (14.87)                                  | 0.10 (0.17)   |
|                        | 1.387              | 2.05                                  | 18.26                                          | 0.16          |
| N(1)-C(6)              | 1.4720(8)          | 1.87 (1.73)                           | 13.88 (10.18)                                  | 0.06 (0.06)   |
|                        | 1.469              | 1.70                                  | 13.64                                          | 0.02          |
| N(3)-C(11)             | 1.4628(7)          | 1.86 (1.75)                           | 13.45 (9.92)                                   | 0.05 (0.07)   |
|                        | 1.460              | 1.72                                  | 13.80                                          | 0.07          |
| C(2)-C(10)             | 1.4766(8)          | 1.86 (1.79)                           | 14.24 (12.24)                                  | 0.05 (0.05)   |
|                        | 1.472              | 1.81                                  | 17.27                                          | 0.06          |
| C(4)-H(4) <sup>a</sup> | 1.083              | 1.92 (1.88)                           | 24.57 (19.57)                                  | -             |
|                        | 1.090              | 1.94                                  | 25.68                                          |               |
| C(5)-H(5)              | 1.083              | 1.90 (1.88)                           | 21.64 (19.57)                                  | -             |
|                        | 1.093              | 1.93                                  | 25.55                                          |               |
| C(6)-C(7)              | 1.5212(10)         | 1.72 (1.69)                           | 12.24 (11.57)                                  | 0.07 (0.03)   |
|                        | 1.525              | 1.67                                  | 15.04                                          | 0.03          |
| C(6)-H(6A)             | 1.091              | 1.73 (1.89)                           | 14.83 (21.51)                                  | -             |
|                        | 1.099              | 1.92                                  | 23.85                                          |               |
| C(6)-H(6B)             | 1.091              | 1.80 (1.90)                           | 16.41 (21.51)                                  | -             |
|                        | 1.098              | 1.92                                  | 23.84                                          |               |
| C(7)-C(8)              | 1.5198(8)          | 1.71 (1.66)                           | 11.12 (11.12)                                  | 0.06 (0.02)   |

|              |                     |                     |                        |                     |
|--------------|---------------------|---------------------|------------------------|---------------------|
|              | 1.526               | 1.66                | 14.85                  | 0.015               |
| C(7)-H(7A)   | 1.094<br>1.101      | 1.85 (1.86)<br>1.87 | 17.82 (20.28)<br>22.33 | -                   |
| C(7)-H(7B)   | 1.094<br>1.101      | 1.85 (1.86)<br>1.86 | 17.9 (20.26)<br>22.15  | -                   |
| C(8)-C(9)    | 1.5149(10)<br>1.525 | 1.75 (1.65)<br>1.65 | 12.31 (10.76)<br>14.77 | 0.11 (0.01)<br>0.01 |
| C(8)-H(8A)   | 1.094<br>1.101      | 1.78 (1.86)<br>1.87 | 14.37 (20.28)<br>22.09 | -                   |
| C(8)-H(8B)   | 1.094<br>1.101      | 1.72 (1.85)<br>1.86 | 12.7 (20.26)<br>21.94  | -                   |
| C(9)-H(9A)   | 1.091<br>0.099      | 1.65 (1.85)<br>1.86 | 10.79 (20.20)<br>22.19 | -                   |
| C(9)-H(9B)   | 1.091<br>1.100      | 1.62 (1.85)<br>1.86 | 7.43 (20.15)<br>22.06  | -                   |
| C(9)-H(9C)   | 1.091<br>1.100      | 1.89 (1.85)<br>1.86 | 18.05 (20.18)<br>22.18 | -                   |
| C(10)-H(10A) | 1.089<br>1.094      | 1.77 (1.85)<br>1.88 | 15.00 (20.43)<br>22.67 | -                   |
| C(10)-H(10B) | 1.089<br>1.103      | 1.65 (1.85)<br>1.85 | 9.77 (20.37)<br>22.40  | -                   |
| C(10)-H(10C) | 1.089<br>1.101      | 1.82 (1.85)<br>1.86 | 16.43 (20.39)<br>22.75 | -                   |
| C(11)-H(11A) | 1.093<br>1.100      | 1.82 (1.88)<br>1.90 | 15.26 (21.50)<br>23.70 | -                   |
| C(11)-H(11B) | 1.093<br>1.097      | 1.87 (1.88)<br>1.92 | 20.29 (21.52)<br>24.26 | -                   |
| C(11)-H(11C) | 1.093<br>1.096      | 1.76 (1.88)<br>1.90 | 14.15 (21.49)<br>23.57 | -                   |

<sup>a</sup> In the multipole and the invariom refinements, the C-H distances were fixed at the values from the invariom database; <sup>b</sup>  $\epsilon$  stands for the bond ellipticities that are given here for C-N and C-C bonds.

**Table S2.** Atomic charges (e) and volumes ( $\text{\AA}^3$ ) in BDMIM[Cl] from multipole and invariom (in parentheses) modeling of X-ray diffraction data and from periodic quantum chemistry (second entry).

| Atom  | Charge                 | Volume                 | Atom   | Charge                 | Volume               |
|-------|------------------------|------------------------|--------|------------------------|----------------------|
| Cl(1) | -0.85 (-1.01)<br>-0.78 | 37.07 (34.40)<br>37.41 | H(6B)  | +0.22 (+0.09)<br>+0.04 | 6.13 (6.76)<br>7.04  |
| N(1)  | -0.99 (-0.86)<br>-2.17 | 10.11 (10.13)<br>12.53 | H(7A)  | +0.12 (+0.05)<br>0.00  | 6.27 (6.84)<br>7.33  |
| N(3)  | -0.94 (-0.85)<br>-2.15 | 10.95 (11.02)<br>12.86 | H(7B)  | +0.09 (+0.05)<br>0.00  | 7.09 (7.31)<br>7.34  |
| C(2)  | +0.68 (+0.73)<br>+1.83 | 7.53 (7.64)<br>5.55    | H(8A)  | +0.12 (+0.05)<br>-0.02 | 7.50 (7.87)<br>8.10  |
| C(4)  | +0.01 (+0.21)<br>+0.74 | 11.92 (10.80)<br>9.58  | H(8B)  | +0.08 (+0.05)<br>-0.03 | 6.44 (6.86)<br>7.15  |
| C(5)  | +0.11 (+0.21)<br>+0.74 | 12.67 (11.54)<br>10.23 | H(9A)  | +0.18 (+0.05)<br>0.00  | 6.65 (7.84)<br>7.68  |
| C(6)  | -0.01 (+0.24)<br>+0.60 | 9.94 (8.06)<br>7.44    | H(9B)  | +0.22 (+0.05)<br>-0.01 | 6.38 (6.81)<br>7.36  |
| C(7)  | -0.10 (-0.01)<br>+0.05 | 8.74 (8.52)<br>8.24    | H(9C)  | +0.16 (+0.05)<br>0.00  | 5.73 (6.71)<br>6.70  |
| C(8)  | -0.18 (-0.01)<br>+0.07 | 9.23 (8.51)<br>8.12    | H(10A) | +0.23 (+0.08)<br>+0.02 | 6.54 (7.63)<br>7.63  |
| C(9)  | -0.51 (-0.01)<br>+0.02 | 13.67 (10.45)<br>10.25 | H(10B) | +0.17 (+0.08)<br>+0.08 | 5.33 (6.24)<br>6.03  |
| C(10) | -0.37 (+0.06)<br>+0.01 | 12.36 (9.93)<br>10.07  | H(10C) | +0.18 (+0.08)<br>+0.08 | 5.81 (6.56)<br>6.29  |
| C(11) | +0.01 (+0.26)<br>+0.55 | 12.27 (10.11)<br>9.16  | H(11A) | +0.11 (+0.09)<br>+0.07 | 6.14 (6.53)<br>6.60  |
| H(4)  | +0.35 (+0.02)<br>+0.06 | 4.51 (6.62)<br>6.05    | H(11B) | +0.25 (+0.08)<br>+0.08 | 5.01 (6.91)<br>7.03  |
| H(5)  | +0.31 (+0.02)<br>+0.08 | 4.68 (6.47)<br>5.68    | H(11C) | +0.17 (+0.09)<br>+0.03 | 37.07 (6.95)<br>7.41 |
| H(6A) | +0.21 (+0.09)<br>+0.04 | 6.15 (6.89)<br>7.17    |        |                        |                      |



***XD output from conventional multipole refinement of high-resolution X-ray diffraction data***

Table M1. Monopole Populations, Radial Parameters and Net Atomic Charges.

| Atom   | Pval      | Kappa | P00   | Kappa' | Net charge |
|--------|-----------|-------|-------|--------|------------|
| CL(1)  | 7.883(15) | 1.025 | 0.000 | 1.460  | -0.883(15) |
| N(1)   | 5.025(17) | 1.008 | 0.000 | 1.007  | -0.024(17) |
| N(3)   | 4.949(17) | 1.008 | 0.000 | 1.007  | +0.051(17) |
| C(2)   | 4.158(20) | 1.011 | 0.000 | 0.933  | -0.158(20) |
| C(4)   | 4.208(27) | 1.009 | 0.000 | 0.946  | -0.208(27) |
| C(5)   | 4.170(26) | 1.009 | 0.000 | 0.946  | -0.169(26) |
| C(6)   | 4.190(28) | 1.009 | 0.000 | 0.917  | -0.190(28) |
| C(7)   | 4.099(29) | 1.007 | 0.000 | 0.912  | -0.098(29) |
| C(8)   | 4.202(28) | 1.007 | 0.000 | 0.912  | -0.202(28) |
| C(9)   | 4.393(34) | 1.009 | 0.000 | 0.962  | -0.392(34) |
| C(10)  | 4.243(32) | 1.012 | 0.000 | 0.860  | -0.242(32) |
| C(11)  | 4.144(32) | 1.008 | 0.000 | 0.878  | -0.143(32) |
| H(4)   | 0.735(14) | 1.200 | 0.000 | 1.200  | +0.265(14) |
| H(5)   | 0.758(14) | 1.200 | 0.000 | 1.200  | +0.242(14) |
| H(6A)  | 0.833(16) | 1.200 | 0.000 | 1.200  | +0.167(16) |
| H(6B)  | 0.799(17) | 1.200 | 0.000 | 1.200  | +0.200(17) |
| H(7A)  | 0.888(16) | 1.200 | 0.000 | 1.200  | +0.112(16) |
| H(7B)  | 0.902(16) | 1.200 | 0.000 | 1.200  | +0.098(16) |
| H(8A)  | 0.841(15) | 1.200 | 0.000 | 1.200  | +0.158(15) |
| H(8B)  | 0.953(16) | 1.200 | 0.000 | 1.200  | +0.046(16) |
| H(9A)  | 0.871(18) | 1.200 | 0.000 | 1.200  | +0.128(18) |
| H(9B)  | 0.774(18) | 1.200 | 0.000 | 1.200  | +0.225(18) |
| H(9C)  | 0.898(17) | 1.200 | 0.000 | 1.200  | +0.101(17) |
| H(10A) | 0.793(18) | 1.200 | 0.000 | 1.200  | +0.207(18) |
| H(10B) | 0.918(19) | 1.200 | 0.000 | 1.200  | +0.082(19) |
| H(10C) | 0.832(19) | 1.200 | 0.000 | 1.200  | +0.168(19) |
| H(11A) | 0.881(18) | 1.200 | 0.000 | 1.200  | +0.119(18) |
| H(11B) | 0.821(16) | 1.200 | 0.000 | 1.200  | +0.179(16) |
| H(11C) | 0.842(17) | 1.200 | 0.000 | 1.200  | +0.158(17) |

Table M2. Dipole Population Parameters.

| Atom   | D11+       | D11-       | D10        | Kappa' |
|--------|------------|------------|------------|--------|
| CL(1)  | -0.089(3)  | 0.231(3)   | 0.044(3)   | 1.460  |
| N(1)   | -0.020(7)  | -0.011(7)  | -0.012(6)  | 1.007  |
| N(3)   | 0.058(7)   | 0.002(7)   | 0.001(6)   | 1.007  |
| C(2)   | -0.009(8)  | -0.023(10) | -0.065(10) | 0.933  |
| C(4)   | -0.015(9)  | 0.056(12)  | 0.004(8)   | 0.946  |
| C(5)   | -0.013(9)  | -0.055(12) | -0.002(8)  | 0.946  |
| C(6)   | -0.081(9)  | -0.050(11) | -0.087(13) | 0.917  |
| C(7)   | -0.008(11) | -0.048(10) | -0.024(10) | 0.912  |
| C(8)   | 0.076(11)  | 0.033(10)  | -0.035(10) | 0.912  |
| C(9)   | -0.035(12) | -0.072(13) | -0.030(10) | 0.962  |
| C(10)  | -0.111(15) | 0.026(15)  | -0.104(10) | 0.860  |
| C(11)  | 0.034(13)  | 0.083(13)  | -0.060(8)  | 0.878  |
| H(4)   | 0.000      | 0.000      | 0.178(9)   | 1.200  |
| H(5)   | 0.000      | 0.000      | 0.151(9)   | 1.200  |
| H(6A)  | 0.000      | 0.000      | 0.146(11)  | 1.200  |
| H(6B)  | 0.000      | 0.000      | 0.101(10)  | 1.200  |
| H(7A)  | 0.000      | 0.000      | 0.166(10)  | 1.200  |
| H(7B)  | 0.000      | 0.000      | 0.124(10)  | 1.200  |
| H(8A)  | 0.000      | 0.000      | 0.093(10)  | 1.200  |
| H(8B)  | 0.000      | 0.000      | 0.143(10)  | 1.200  |
| H(9A)  | 0.000      | 0.000      | 0.153(12)  | 1.200  |
| H(9B)  | 0.000      | 0.000      | 0.066(11)  | 1.200  |
| H(9C)  | 0.000      | 0.000      | 0.164(11)  | 1.200  |
| H(10A) | 0.000      | 0.000      | 0.117(10)  | 1.200  |
| H(10B) | 0.000      | 0.000      | 0.163(11)  | 1.200  |
| H(10C) | 0.000      | 0.000      | 0.169(11)  | 1.200  |
| H(11A) | 0.000      | 0.000      | 0.191(12)  | 1.200  |
| H(11B) | 0.000      | 0.000      | 0.222(9)   | 1.200  |
| H(11C) | 0.000      | 0.000      | 0.128(11)  | 1.200  |

Table M3. Quadrupole Population Parameters.

| Atom   | Q20        | Q21+       | Q21-       | Q22+       | Q22-       | Kappa' |
|--------|------------|------------|------------|------------|------------|--------|
| CL(1)  | -0.041(4)  | -0.073(4)  | 0.020(4)   | 0.072(5)   | 0.015(5)   | 1.460  |
| N(1)   | -0.029(7)  | -0.036(7)  | 0.023(7)   | 0.005(7)   | -0.045(7)  | 1.007  |
| N(3)   | -0.043(6)  | -0.016(6)  | 0.014(6)   | -0.005(7)  | -0.065(7)  | 1.007  |
| C(2)   | 0.136(10)  | -0.007(9)  | -0.013(10) | -0.192(9)  | -0.035(8)  | 0.933  |
| C(4)   | -0.207(9)  | -0.012(8)  | 0.053(8)   | -0.096(9)  | -0.026(10) | 0.946  |
| C(5)   | -0.182(9)  | 0.011(8)   | 0.060(8)   | -0.086(10) | -0.002(10) | 0.946  |
| C(6)   | 0.017(9)   | 0.018(9)   | 0.022(11)  | -0.062(9)  | 0.047(9)   | 0.917  |
| C(7)   | 0.012(9)   | -0.025(10) | 0.045(10)  | 0.013(10)  | -0.029(9)  | 0.912  |
| C(8)   | 0.014(8)   | -0.043(10) | -0.039(10) | 0.026(10)  | 0.028(9)   | 0.912  |
| C(9)   | 0.042(11)  | 0.060(10)  | 0.033(11)  | 0.096(9)   | 0.041(9)   | 0.962  |
| C(10)  | 0.001(11)  | 0.027(10)  | 0.016(10)  | 0.021(11)  | 0.046(11)  | 0.860  |
| C(11)  | -0.090(9)  | -0.015(9)  | -0.025(9)  | -0.013(10) | -0.006(10) | 0.878  |
| H(4)   | 0.075(11)  | 0.000      | 0.000      | 0.000      | 0.000      | 1.200  |
| H(5)   | 0.054(12)  | 0.000      | 0.000      | 0.000      | 0.000      | 1.200  |
| H(6A)  | 0.034(12)  | 0.000      | 0.000      | 0.000      | 0.000      | 1.200  |
| H(6B)  | 0.037(12)  | 0.000      | 0.000      | 0.000      | 0.000      | 1.200  |
| H(7A)  | 0.050(12)  | 0.000      | 0.000      | 0.000      | 0.000      | 1.200  |
| H(7B)  | 0.074(13)  | 0.000      | 0.000      | 0.000      | 0.000      | 1.200  |
| H(8A)  | 0.003(11)  | 0.000      | 0.000      | 0.000      | 0.000      | 1.200  |
| H(8B)  | 0.049(12)  | 0.000      | 0.000      | 0.000      | 0.000      | 1.200  |
| H(9A)  | 0.010(13)  | 0.000      | 0.000      | 0.000      | 0.000      | 1.200  |
| H(9B)  | -0.055(14) | 0.000      | 0.000      | 0.000      | 0.000      | 1.200  |
| H(9C)  | 0.069(13)  | 0.000      | 0.000      | 0.000      | 0.000      | 1.200  |
| H(10A) | 0.035(13)  | 0.000      | 0.000      | 0.000      | 0.000      | 1.200  |
| H(10B) | 0.045(13)  | 0.000      | 0.000      | 0.000      | 0.000      | 1.200  |
| H(10C) | 0.028(13)  | 0.000      | 0.000      | 0.000      | 0.000      | 1.200  |
| H(11A) | -0.005(13) | 0.000      | 0.000      | 0.000      | 0.000      | 1.200  |
| H(11B) | 0.099(12)  | 0.000      | 0.000      | 0.000      | 0.000      | 1.200  |
| H(11C) | 0.028(13)  | 0.000      | 0.000      | 0.000      | 0.000      | 1.200  |

Table M4. Octupole Population Parameters.

| Atom   | O30        | O31+       | O31-       | O32+       | O32-       | O33+      | O33-       | Kappa' |
|--------|------------|------------|------------|------------|------------|-----------|------------|--------|
| CL(1)  | 0.004(7)   | -0.022(6)  | -0.013(7)  | 0.023(6)   | -0.048(6)  | 0.049(6)  | -0.004(6)  | 1.460  |
| N(1)   | 0.001(8)   | 0.022(8)   | -0.029(8)  | 0.003(9)   | 0.007(9)   | 0.155(9)  | 0.046(10)  | 1.007  |
| N(3)   | 0.003(8)   | 0.003(8)   | -0.023(8)  | 0.033(8)   | -0.007(9)  | 0.134(9)  | 0.053(10)  | 1.007  |
| C(2)   | 0.300(14)  | 0.007(11)  | -0.024(14) | 0.239(12)  | -0.011(11) | 0.013(10) | 0.021(10)  | 0.933  |
| C(4)   | 0.012(10)  | -0.045(10) | 0.019(11)  | -0.041(11) | -0.001(10) | 0.337(13) | -0.130(12) | 0.946  |
| C(5)   | 0.006(10)  | -0.039(10) | 0.044(11)  | -0.014(11) | 0.003(11)  | 0.277(14) | -0.059(13) | 0.946  |
| C(6)   | 0.014(11)  | -0.136(11) | -0.214(12) | 0.037(12)  | -0.010(13) | 0.227(13) | -0.001(12) | 0.917  |
| C(7)   | -0.027(12) | -0.013(10) | 0.034(13)  | -0.336(13) | -0.023(12) | 0.047(13) | 0.037(12)  | 0.912  |
| C(8)   | -0.017(12) | 0.040(11)  | -0.042(13) | -0.314(13) | 0.042(12)  | 0.053(13) | 0.038(11)  | 0.912  |
| C(9)   | 0.244(14)  | 0.017(11)  | 0.017(12)  | -0.026(13) | -0.012(13) | 0.144(10) | 0.013(8)   | 0.962  |
| C(10)  | 0.284(14)  | 0.043(10)  | 0.019(10)  | 0.059(13)  | -0.066(13) | -0.009(9) | -0.103(11) | 0.860  |
| C(11)  | 0.325(12)  | 0.014(9)   | 0.043(9)   | -0.028(11) | 0.013(10)  | -0.095(8) | -0.105(11) | 0.878  |
| H(4)   | 0.000      | 0.000      | 0.000      | 0.000      | 0.000      | 0.000     | 0.000      | 1.200  |
| H(5)   | 0.000      | 0.000      | 0.000      | 0.000      | 0.000      | 0.000     | 0.000      | 1.200  |
| H(6A)  | 0.000      | 0.000      | 0.000      | 0.000      | 0.000      | 0.000     | 0.000      | 1.200  |
| H(6B)  | 0.000      | 0.000      | 0.000      | 0.000      | 0.000      | 0.000     | 0.000      | 1.200  |
| H(7A)  | 0.000      | 0.000      | 0.000      | 0.000      | 0.000      | 0.000     | 0.000      | 1.200  |
| H(7B)  | 0.000      | 0.000      | 0.000      | 0.000      | 0.000      | 0.000     | 0.000      | 1.200  |
| H(8A)  | 0.000      | 0.000      | 0.000      | 0.000      | 0.000      | 0.000     | 0.000      | 1.200  |
| H(8B)  | 0.000      | 0.000      | 0.000      | 0.000      | 0.000      | 0.000     | 0.000      | 1.200  |
| H(9A)  | 0.000      | 0.000      | 0.000      | 0.000      | 0.000      | 0.000     | 0.000      | 1.200  |
| H(9B)  | 0.000      | 0.000      | 0.000      | 0.000      | 0.000      | 0.000     | 0.000      | 1.200  |
| H(9C)  | 0.000      | 0.000      | 0.000      | 0.000      | 0.000      | 0.000     | 0.000      | 1.200  |
| H(10A) | 0.000      | 0.000      | 0.000      | 0.000      | 0.000      | 0.000     | 0.000      | 1.200  |
| H(10B) | 0.000      | 0.000      | 0.000      | 0.000      | 0.000      | 0.000     | 0.000      | 1.200  |
| H(10C) | 0.000      | 0.000      | 0.000      | 0.000      | 0.000      | 0.000     | 0.000      | 1.200  |
| H(11A) | 0.000      | 0.000      | 0.000      | 0.000      | 0.000      | 0.000     | 0.000      | 1.200  |
| H(11B) | 0.000      | 0.000      | 0.000      | 0.000      | 0.000      | 0.000     | 0.000      | 1.200  |
| H(11C) | 0.000      | 0.000      | 0.000      | 0.000      | 0.000      | 0.000     | 0.000      | 1.200  |

Table M5. Hexadecapole Population Parameters.

| Atom   | H40        | H41+       | H41-       | H42+       | H42-       | H43+       | H43-       | H44+       | H44-       | Kappa' |
|--------|------------|------------|------------|------------|------------|------------|------------|------------|------------|--------|
| CL(1)  | -0.053(11) | 0.052(10)  | -0.027(10) | 0.032(11)  | -0.022(11) | -0.025(10) | 0.086(10)  | -0.016(9)  | -0.038(9)  | 1.460  |
| N(1)   | 0.024(10)  | 0.007(10)  | 0.014(10)  | 0.040(10)  | -0.016(11) | -0.001(10) | 0.000(13)  | 0.012(12)  | -0.002(11) | 1.007  |
| N(3)   | 0.039(10)  | -0.017(9)  | 0.028(9)   | 0.004(10)  | -0.001(10) | -0.027(9)  | -0.006(12) | 0.025(11)  | 0.017(10)  | 1.007  |
| C(2)   | -0.003(17) | -0.014(12) | -0.003(16) | -0.082(16) | 0.014(16)  | 0.023(12)  | -0.022(14) | 0.006(12)  | -0.007(12) | 0.933  |
| C(4)   | 0.064(12)  | -0.011(11) | -0.027(11) | -0.006(12) | -0.017(12) | -0.048(12) | -0.039(13) | 0.091(14)  | -0.037(14) | 0.946  |
| C(5)   | 0.041(13)  | 0.006(11)  | -0.011(11) | -0.006(12) | -0.014(12) | -0.016(12) | -0.060(14) | 0.064(15)  | -0.009(15) | 0.946  |
| C(6)   | 0.155(13)  | -0.077(12) | 0.013(13)  | -0.017(14) | 0.007(15)  | -0.025(14) | 0.029(14)  | 0.075(14)  | 0.006(14)  | 0.917  |
| C(7)   | -0.048(14) | 0.008(11)  | 0.028(15)  | -0.009(13) | 0.017(14)  | 0.030(13)  | 0.006(13)  | 0.025(13)  | -0.033(12) | 0.912  |
| C(8)   | -0.006(14) | -0.003(11) | -0.022(15) | -0.068(14) | 0.024(14)  | -0.024(13) | -0.017(13) | 0.023(12)  | -0.046(12) | 0.912  |
| C(9)   | 0.081(15)  | 0.037(14)  | -0.058(15) | 0.095(13)  | -0.059(13) | 0.062(14)  | 0.004(12)  | 0.017(11)  | 0.072(11)  | 0.962  |
| C(10)  | 0.073(14)  | -0.015(14) | 0.042(13)  | -0.026(12) | 0.030(13)  | -0.002(11) | -0.036(14) | 0.087(12)  | 0.037(12)  | 0.860  |
| C(11)  | 0.138(13)  | 0.017(12)  | -0.007(13) | -0.006(12) | -0.004(12) | 0.051(10)  | 0.002(13)  | -0.019(10) | 0.032(12)  | 0.878  |
| H(4)   | 0.000      | 0.000      | 0.000      | 0.000      | 0.000      | 0.000      | 0.000      | 0.000      | 0.000      | 1.200  |
| H(5)   | 0.000      | 0.000      | 0.000      | 0.000      | 0.000      | 0.000      | 0.000      | 0.000      | 0.000      | 1.200  |
| H(6A)  | 0.000      | 0.000      | 0.000      | 0.000      | 0.000      | 0.000      | 0.000      | 0.000      | 0.000      | 1.200  |
| H(6B)  | 0.000      | 0.000      | 0.000      | 0.000      | 0.000      | 0.000      | 0.000      | 0.000      | 0.000      | 1.200  |
| H(7A)  | 0.000      | 0.000      | 0.000      | 0.000      | 0.000      | 0.000      | 0.000      | 0.000      | 0.000      | 1.200  |
| H(7B)  | 0.000      | 0.000      | 0.000      | 0.000      | 0.000      | 0.000      | 0.000      | 0.000      | 0.000      | 1.200  |
| H(8A)  | 0.000      | 0.000      | 0.000      | 0.000      | 0.000      | 0.000      | 0.000      | 0.000      | 0.000      | 1.200  |
| H(8B)  | 0.000      | 0.000      | 0.000      | 0.000      | 0.000      | 0.000      | 0.000      | 0.000      | 0.000      | 1.200  |
| H(9A)  | 0.000      | 0.000      | 0.000      | 0.000      | 0.000      | 0.000      | 0.000      | 0.000      | 0.000      | 1.200  |
| H(9B)  | 0.000      | 0.000      | 0.000      | 0.000      | 0.000      | 0.000      | 0.000      | 0.000      | 0.000      | 1.200  |
| H(9C)  | 0.000      | 0.000      | 0.000      | 0.000      | 0.000      | 0.000      | 0.000      | 0.000      | 0.000      | 1.200  |
| H(10A) | 0.000      | 0.000      | 0.000      | 0.000      | 0.000      | 0.000      | 0.000      | 0.000      | 0.000      | 1.200  |
| H(10B) | 0.000      | 0.000      | 0.000      | 0.000      | 0.000      | 0.000      | 0.000      | 0.000      | 0.000      | 1.200  |
| H(10C) | 0.000      | 0.000      | 0.000      | 0.000      | 0.000      | 0.000      | 0.000      | 0.000      | 0.000      | 1.200  |
| H(11A) | 0.000      | 0.000      | 0.000      | 0.000      | 0.000      | 0.000      | 0.000      | 0.000      | 0.000      | 1.200  |
| H(11B) | 0.000      | 0.000      | 0.000      | 0.000      | 0.000      | 0.000      | 0.000      | 0.000      | 0.000      | 1.200  |
| H(11C) | 0.000      | 0.000      | 0.000      | 0.000      | 0.000      | 0.000      | 0.000      | 0.000      | 0.000      | 1.200  |

\_atom\_local\_axes\_atom\_label

\_atom\_local\_axes\_atom0

\_atom\_local\_axes\_ax1

\_atom\_local\_axes\_atom1

\_atom\_local\_axes\_atom2

\_atom\_local\_axes\_ax2

|        |       |   |        |        |   |
|--------|-------|---|--------|--------|---|
| CL(1)  | N(1)  | X | CL(1)  | N(3)   | Y |
| N(1)   | C(2)  | X | N(1)   | C(6)   | Y |
| N(3)   | C(2)  | X | N(3)   | C(11)  | Y |
| C(2)   | C(10) | Z | C(2)   | N(3)   | Y |
| C(4)   | N(3)  | X | C(4)   | C(5)   | Y |
| C(5)   | N(1)  | X | C(5)   | C(4)   | Y |
| C(6)   | N(1)  | X | C(6)   | C(7)   | Y |
| C(7)   | DUM0  | Z | C(7)   | C(8)   | Y |
| C(8)   | DUM1  | Z | C(8)   | C(9)   | Y |
| C(9)   | C(8)  | Z | C(9)   | H(9C)  | X |
| C(10)  | C(2)  | Z | C(10)  | H(10C) | Y |
| C(11)  | N(3)  | Z | C(11)  | H(11C) | Y |
| H(4)   | C(4)  | Z | H(4)   | C(5)   | Y |
| H(5)   | C(5)  | Z | H(5)   | C(4)   | Y |
| H(6A)  | C(6)  | Z | H(6A)  | H(6B)  | Y |
| H(6B)  | C(6)  | Z | H(6B)  | H(6A)  | Y |
| H(7A)  | C(7)  | Z | H(7A)  | H(7B)  | Y |
| H(7B)  | C(7)  | Z | H(7B)  | H(7A)  | Y |
| H(8A)  | C(8)  | Z | H(8A)  | H(8B)  | Y |
| H(8B)  | C(8)  | Z | H(8B)  | H(8A)  | Y |
| H(9A)  | C(9)  | Z | H(9A)  | H(9B)  | Y |
| H(9B)  | C(9)  | Z | H(9B)  | H(9A)  | Y |
| H(9C)  | C(9)  | Z | H(9C)  | H(9A)  | Y |
| H(10A) | C(10) | Z | H(10A) | C(2)   | Y |
| H(10B) | C(10) | Z | H(10B) | C(2)   | Y |
| H(10C) | C(10) | Z | H(10C) | C(2)   | Y |
| H(11A) | C(11) | Z | H(11A) | H(11B) | Y |
| H(11B) | C(11) | Z | H(11B) | H(11A) | Y |
| H(11C) | C(11) | Z | H(11C) | H(11A) | Y |

-----

| <u>_atom_site_label</u> | <u>_atom_site_fract_x</u> | <u>_atom_site_fract_y</u> | <u>_atom_site_fract_z</u> | <u>_atom_site_occupancy</u> | <u>_atom_site_symmetry_multiplicity</u> | <u>_atom_site_U_iso_or_equiv</u> |
|-------------------------|---------------------------|---------------------------|---------------------------|-----------------------------|-----------------------------------------|----------------------------------|
| CL(1)                   | 0.065851                  | 0.208628                  | 0.268473                  | 1                           | 4                                       | 0.033                            |
| N(1)                    | 0.609115                  | 0.04399                   | 0.353036                  | 1                           | 4                                       | 0.024                            |
| N(3)                    | 0.762892                  | 0.044268                  | 0.517106                  | 1                           | 4                                       | 0.022                            |
| C(2)                    | 0.687066                  | 0.112                     | 0.434268                  | 1                           | 4                                       | 0.023                            |
| C(4)                    | 0.7333                    | -0.069035                 | 0.487848                  | 1                           | 4                                       | 0.025                            |
| C(5)                    | 0.636785                  | -0.069456                 | 0.384672                  | 1                           | 4                                       | 0.026                            |
| C(6)                    | 0.511028                  | 0.083042                  | 0.246203                  | 1                           | 4                                       | 0.032                            |
| C(7)                    | 0.614306                  | 0.125878                  | 0.139047                  | 1                           | 4                                       | 0.028                            |
| C(8)                    | 0.714677                  | 0.032442                  | 0.079718                  | 1                           | 4                                       | 0.029                            |
| C(9)                    | 0.812669                  | 0.078309                  | -0.028144                 | 1                           | 4                                       | 0.043                            |
| C(10)                   | 0.692504                  | 0.238461                  | 0.435022                  | 1                           | 4                                       | 0.033                            |
| C(11)                   | 0.860641                  | 0.084972                  | 0.622406                  | 1                           | 4                                       | 0.030                            |
| H(4)                    | 0.777031                  | -0.138337                 | 0.546286                  | 1                           | 4                                       | 0.036                            |
| H(5)                    | 0.586866                  | -0.140845                 | 0.332541                  | 1                           | 4                                       | 0.039                            |
| H(6A)                   | 0.423289                  | 0.145705                  | 0.278014                  | 1                           | 4                                       | 0.043                            |
| H(6B)                   | 0.439974                  | 0.009666                  | 0.215031                  | 1                           | 4                                       | 0.044                            |
| H(7A)                   | 0.693165                  | 0.193752                  | 0.174469                  | 1                           | 4                                       | 0.044                            |
| H(7B)                   | 0.533999                  | 0.162654                  | 0.068077                  | 1                           | 4                                       | 0.049                            |
| H(8A)                   | 0.795222                  | -0.005219                 | 0.149965                  | 1                           | 4                                       | 0.041                            |
| H(8B)                   | 0.633932                  | -0.036604                 | 0.050134                  | 1                           | 4                                       | 0.048                            |
| H(9A)                   | 0.873705                  | 0.009715                  | -0.077998                 | 1                           | 4                                       | 0.056                            |
| H(9B)                   | 0.901485                  | 0.140057                  | 0.005781                  | 1                           | 4                                       | 0.053                            |
| H(9C)                   | 0.733869                  | 0.124248                  | -0.093143                 | 1                           | 4                                       | 0.060                            |
| H(10A)                  | 0.597642                  | 0.271277                  | 0.373918                  | 1                           | 4                                       | 0.048                            |
| H(10B)                  | 0.808332                  | 0.265004                  | 0.398619                  | 1                           | 4                                       | 0.048                            |
| H(10C)                  | 0.673469                  | 0.266513                  | 0.53062                   | 1                           | 4                                       | 0.049                            |
| H(11A)                  | 0.788936                  | 0.144558                  | 0.677264                  | 1                           | 4                                       | 0.049                            |
| H(11B)                  | 0.898693                  | 0.011247                  | 0.678178                  | 1                           | 4                                       | 0.045                            |
| H(11C)                  | 0.965579                  | 0.128634                  | 0.584666                  | 1                           | 4                                       | 0.045                            |

\_atom\_dummy\_label  
\_atom\_dummy\_fract\_x  
\_atom\_dummy\_fract\_y  
\_atom\_dummy\_fract\_z  
DUM0 0.612902 0.044379 0.167476  
DUM1 0.71329 0.11411 0.051563

---

\_atom\_site\_aniso\_label  
\_atom\_site\_aniso\_U\_11  
\_atom\_site\_aniso\_U\_22  
\_atom\_site\_aniso\_U\_33  
\_atom\_site\_aniso\_U\_12  
\_atom\_site\_aniso\_U\_13  
\_atom\_site\_aniso\_U\_23  
CL(1) 0.033295 0.029996 0.034123 0.003272 -0.003783 0.008092  
N(1) 0.022445 0.025669 0.024569 -0.000626 0.001094 -0.000013  
N(3) 0.021891 0.02061 0.022947 -0.00106 0.002099 -0.001054  
C(2) 0.023468 0.019686 0.024761 0.001237 0.002965 -0.000672  
C(4) 0.027955 0.020089 0.026084 -0.001894 0.002526 0.000844  
C(5) 0.028027 0.023284 0.027225 -0.005751 0.001977 -0.001463  
C(6) 0.023839 0.042724 0.030427 0.004213 -0.002017 0.001266  
C(7) 0.033015 0.024929 0.025278 0.004375 -0.003017 0.001035  
C(8) 0.031436 0.027405 0.026927 0.004808 -0.001199 0.001432  
C(9) 0.042534 0.058481 0.028481 0.009144 0.005248 0.008205  
C(10) 0.043813 0.020224 0.033781 0.004774 0.005641 -0.001315  
C(11) 0.028755 0.030423 0.029457 -0.001388 -0.002141 -0.004333  
H(4) 0.035228 0.031249 0.040578 0.008122 -0.001162 -0.00093  
H(5) 0.040162 0.030792 0.046129 -0.005197 -0.006471 -0.00598  
H(6A) 0.045567 0.040521 0.041996 0.001473 0.002416 0.010218  
H(6B) 0.048373 0.039846 0.043181 -0.002518 -0.00708 -0.006454  
H(7A) 0.046993 0.038701 0.046255 -0.001011 0.003571 -0.002647  
H(7B) 0.051023 0.056916 0.037666 0.008233 -0.003336 0.012419  
H(8A) 0.046194 0.043313 0.034457 0.003702 -0.002128 0.005834  
H(8B) 0.050952 0.048533 0.043454 -0.009046 -0.002209 -0.003383  
H(9A) 0.073351 0.050713 0.045761 0.000241 0.015393 0.015889  
H(9B) 0.061649 0.052296 0.046055 0.005469 0.005999 -0.005183



H(9C) 0.061158 0.074986 0.043927 0.019612 0.000356 0.020557  
H(10A) 0.048265 0.038165 0.056978 0.00337 -0.01217 0.005303  
H(10B) 0.040274 0.034252 0.068431 -0.000541 0.013275 -0.001768  
H(10C) 0.064774 0.040305 0.040848 -0.008978 0.005582 0.002914  
H(11A) 0.043713 0.054314 0.04765 -0.019102 0.000057 0.013302  
H(11B) 0.051965 0.039223 0.043837 0.004018 -0.008262 0.002889  
H(11C) 0.040917 0.049347 0.045788 -0.003761 0.004159 -0.013119

---

Differences of Mean-Squares Displacement Amplitudes (DMSDA) (1.E4 A\*\*2) along the bonds

| ATOM-->ATOM | /     | DIST   | DMSDA | ATOM | /      | DIST | DMSDA | ATOM  | /      | DIST | DMSDA |
|-------------|-------|--------|-------|------|--------|------|-------|-------|--------|------|-------|
| N(1)        | C(2)  | 1.3396 | -1    | C(5) | 1.3859 | 5    |       | C(6)  | 1.4699 | 7    |       |
| N(3)        | C(2)  | 1.3406 | -2    | C(4) | 1.3811 | 4    |       | C(11) | 1.4619 | 16   |       |
| C(2)        | C(10) | 1.4774 | 8     |      |        |      |       |       |        |      |       |
| C(4)        | C(5)  | 1.3582 | 2     |      |        |      |       |       |        |      |       |
| C(6)        | C(7)  | 1.5264 | -8    |      |        |      |       |       |        |      |       |
| C(7)        | C(8)  | 1.5179 | 1     |      |        |      |       |       |        |      |       |
| C(8)        | C(9)  | 1.5196 | 7     |      |        |      |       |       |        |      |       |

---

data\_FFT

\_refine\_diff\_density\_max 0.180  
\_refine\_diff\_density\_min -0.166  
\_refine\_diff\_density\_rms 0.025

---

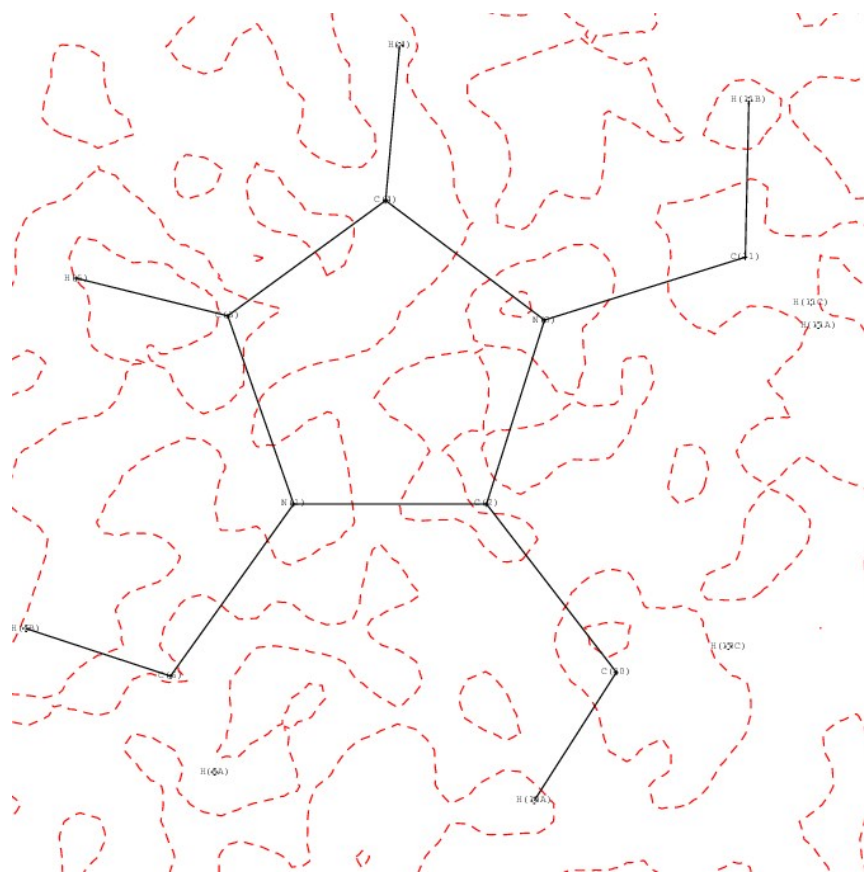

Figure M1. Residual electron density map in the plane of the imidazolium core of the cation. Contours are drawn with 0.1 eÅ<sup>-3</sup> step, zero and negative ones are dashed.

*XD output from invariom refinement of high-resolution X-ray diffraction data*

Table II. Monopole Populations, Radial Parameters and Net Atomic Charges.

| Atom   | Pval  | Kappa | P00   | Kappa' | Net charge |
|--------|-------|-------|-------|--------|------------|
| CL(1)  | 8.000 | 1.011 | 0.000 | 1.000  | -1.00000   |
| N(1)   | 5.048 | 1.005 | 0.000 | 0.979  | -0.04790   |
| N(3)   | 5.048 | 1.005 | 0.000 | 0.979  | -0.04790   |
| C(2)   | 3.895 | 1.023 | 0.000 | 1.000  | +0.10480   |
| C(4)   | 3.959 | 1.019 | 0.000 | 1.000  | +0.04090   |
| C(5)   | 3.959 | 1.019 | 0.000 | 1.000  | +0.04090   |
| C(6)   | 3.874 | 1.014 | 0.000 | 1.000  | +0.12590   |
| C(7)   | 3.907 | 1.012 | 0.000 | 1.000  | +0.09340   |
| C(8)   | 3.907 | 1.012 | 0.000 | 1.000  | +0.09340   |
| C(9)   | 3.780 | 1.018 | 0.000 | 1.000  | +0.22040   |
| C(10)  | 3.709 | 1.026 | 0.000 | 1.000  | +0.29120   |
| C(11)  | 3.750 | 1.018 | 0.000 | 1.000  | +0.25010   |
| H(4)   | 1.092 | 1.082 | 0.000 | 1.200  | -0.09200   |
| H(5)   | 1.092 | 1.082 | 0.000 | 1.200  | -0.09200   |
| H(6A)  | 0.959 | 1.146 | 0.000 | 1.200  | +0.04130   |
| H(6B)  | 0.959 | 1.146 | 0.000 | 1.200  | +0.04130   |
| H(7A)  | 1.004 | 1.127 | 0.000 | 1.200  | -0.00420   |
| H(7B)  | 1.004 | 1.127 | 0.000 | 1.200  | -0.00420   |
| H(8A)  | 1.004 | 1.127 | 0.000 | 1.200  | -0.00420   |
| H(8B)  | 1.004 | 1.127 | 0.000 | 1.200  | -0.00420   |
| H(9A)  | 1.025 | 1.114 | 0.000 | 1.200  | -0.02520   |
| H(9B)  | 1.025 | 1.114 | 0.000 | 1.200  | -0.02520   |
| H(9C)  | 1.025 | 1.114 | 0.000 | 1.200  | -0.02520   |
| H(10A) | 1.006 | 1.120 | 0.000 | 1.200  | -0.00550   |
| H(10B) | 1.006 | 1.120 | 0.000 | 1.200  | -0.00550   |
| H(10C) | 1.006 | 1.120 | 0.000 | 1.200  | -0.00550   |
| H(11A) | 0.985 | 1.130 | 0.000 | 1.200  | +0.01490   |
| H(11B) | 0.985 | 1.130 | 0.000 | 1.200  | +0.01490   |
| H(11C) | 0.985 | 1.130 | 0.000 | 1.200  | +0.01490   |

Table I2. Dipole Population Parameters.

| Atom   | D11+   | D11-  | D10    | Kappa' |
|--------|--------|-------|--------|--------|
| CL(1)  | 0.000  | 0.000 | 0.000  | 1.000  |
| N(1)   | 0.027  | 0.022 | 0.000  | 0.979  |
| N(3)   | 0.027  | 0.022 | 0.000  | 0.979  |
| C(2)   | 0.000  | 0.000 | 0.023  | 1.000  |
| C(4)   | -0.032 | 0.058 | 0.000  | 1.000  |
| C(5)   | -0.032 | 0.058 | 0.000  | 1.000  |
| C(6)   | -0.042 | 0.003 | 0.000  | 1.000  |
| C(7)   | 0.000  | 0.000 | 0.007  | 1.000  |
| C(8)   | 0.000  | 0.000 | 0.007  | 1.000  |
| C(9)   | 0.000  | 0.000 | 0.010  | 1.000  |
| C(10)  | 0.000  | 0.000 | 0.004  | 1.000  |
| C(11)  | 0.000  | 0.000 | -0.033 | 1.000  |
| H(4)   | 0.000  | 0.000 | 0.141  | 1.200  |
| H(5)   | 0.000  | 0.000 | 0.141  | 1.200  |
| H(6A)  | 0.000  | 0.000 | 0.146  | 1.200  |
| H(6B)  | 0.000  | 0.000 | 0.146  | 1.200  |
| H(7A)  | 0.000  | 0.000 | 0.144  | 1.200  |
| H(7B)  | 0.000  | 0.000 | 0.144  | 1.200  |
| H(8A)  | 0.000  | 0.000 | 0.144  | 1.200  |
| H(8B)  | 0.000  | 0.000 | 0.144  | 1.200  |
| H(9A)  | 0.000  | 0.000 | 0.151  | 1.200  |
| H(9B)  | 0.000  | 0.000 | 0.151  | 1.200  |
| H(9C)  | 0.000  | 0.000 | 0.151  | 1.200  |
| H(10A) | 0.000  | 0.000 | 0.158  | 1.200  |
| H(10B) | 0.000  | 0.000 | 0.158  | 1.200  |
| H(10C) | 0.000  | 0.000 | 0.158  | 1.200  |
| H(11A) | 0.000  | 0.000 | 0.154  | 1.200  |
| H(11B) | 0.000  | 0.000 | 0.154  | 1.200  |
| H(11C) | 0.000  | 0.000 | 0.154  | 1.200  |

Table I3. Quadrupole Population Parameters.

| Atom   | Q20    | Q21+  | Q21-  | Q22+   | Q22-   | Kappa' |
|--------|--------|-------|-------|--------|--------|--------|
| CL(1)  | 0.000  | 0.000 | 0.000 | 0.000  | 0.000  | 1.000  |
| N(1)   | 0.004  | 0.000 | 0.000 | 0.002  | -0.007 | 0.979  |
| N(3)   | 0.004  | 0.000 | 0.000 | 0.002  | -0.007 | 0.979  |
| C(2)   | 0.121  | 0.000 | 0.000 | -0.091 | 0.000  | 1.000  |
| C(4)   | -0.104 | 0.000 | 0.000 | -0.080 | -0.003 | 1.000  |
| C(5)   | -0.104 | 0.000 | 0.000 | -0.080 | -0.003 | 1.000  |
| C(6)   | 0.041  | 0.000 | 0.000 | -0.053 | -0.005 | 1.000  |
| C(7)   | -0.002 | 0.000 | 0.000 | 0.004  | 0.000  | 1.000  |
| C(8)   | -0.002 | 0.000 | 0.000 | 0.004  | 0.000  | 1.000  |
| C(9)   | -0.004 | 0.000 | 0.000 | 0.000  | 0.000  | 1.000  |
| C(10)  | -0.007 | 0.000 | 0.000 | 0.000  | 0.000  | 1.000  |
| C(11)  | -0.061 | 0.000 | 0.000 | 0.000  | 0.000  | 1.000  |
| H(4)   | 0.046  | 0.000 | 0.000 | 0.000  | 0.000  | 1.200  |
| H(5)   | 0.046  | 0.000 | 0.000 | 0.000  | 0.000  | 1.200  |
| H(6A)  | 0.065  | 0.000 | 0.000 | 0.000  | 0.000  | 1.200  |
| H(6B)  | 0.065  | 0.000 | 0.000 | 0.000  | 0.000  | 1.200  |
| H(7A)  | 0.063  | 0.000 | 0.000 | 0.000  | 0.000  | 1.200  |
| H(7B)  | 0.063  | 0.000 | 0.000 | 0.000  | 0.000  | 1.200  |
| H(8A)  | 0.063  | 0.000 | 0.000 | 0.000  | 0.000  | 1.200  |
| H(8B)  | 0.063  | 0.000 | 0.000 | 0.000  | 0.000  | 1.200  |
| H(9A)  | 0.063  | 0.000 | 0.000 | 0.000  | 0.000  | 1.200  |
| H(9B)  | 0.063  | 0.000 | 0.000 | 0.000  | 0.000  | 1.200  |
| H(9C)  | 0.063  | 0.000 | 0.000 | 0.000  | 0.000  | 1.200  |
| H(10A) | 0.068  | 0.000 | 0.000 | 0.000  | 0.000  | 1.200  |
| H(10B) | 0.068  | 0.000 | 0.000 | 0.000  | 0.000  | 1.200  |
| H(10C) | 0.068  | 0.000 | 0.000 | 0.000  | 0.000  | 1.200  |
| H(11A) | 0.069  | 0.000 | 0.000 | 0.000  | 0.000  | 1.200  |
| H(11B) | 0.069  | 0.000 | 0.000 | 0.000  | 0.000  | 1.200  |
| H(11C) | 0.069  | 0.000 | 0.000 | 0.000  | 0.000  | 1.200  |

Table I4. Octupole Population Parameters.

| Atom   | O30    | O31+   | O31-   | O32+   | O32-  | O33+   | O33-   | Kappa' |
|--------|--------|--------|--------|--------|-------|--------|--------|--------|
| CL(1)  | 0.000  | 0.000  | 0.000  | 0.000  | 0.000 | 0.000  | 0.000  | 1.000  |
| N(1)   | 0.000  | 0.011  | 0.007  | 0.000  | 0.000 | 0.158  | -0.063 | 0.979  |
| N(3)   | 0.000  | 0.011  | 0.007  | 0.000  | 0.000 | 0.158  | -0.063 | 0.979  |
| C(2)   | 0.210  | 0.000  | 0.000  | 0.149  | 0.000 | 0.000  | 0.000  | 1.000  |
| C(4)   | 0.000  | -0.019 | 0.030  | 0.000  | 0.000 | 0.220  | -0.067 | 1.000  |
| C(5)   | 0.000  | -0.019 | 0.030  | 0.000  | 0.000 | 0.220  | -0.067 | 1.000  |
| C(6)   | 0.000  | -0.131 | -0.193 | 0.000  | 0.000 | 0.189  | -0.024 | 1.000  |
| C(7)   | -0.006 | 0.000  | 0.000  | -0.281 | 0.000 | 0.000  | 0.000  | 1.000  |
| C(8)   | -0.006 | 0.000  | 0.000  | -0.281 | 0.000 | 0.000  | 0.000  | 1.000  |
| C(9)   | 0.217  | 0.000  | 0.000  | 0.000  | 0.000 | 0.168  | 0.000  | 1.000  |
| C(10)  | 0.219  | 0.000  | 0.000  | 0.000  | 0.000 | 0.000  | -0.165 | 1.000  |
| C(11)  | 0.250  | 0.000  | 0.000  | 0.000  | 0.000 | -0.005 | -0.176 | 1.000  |
| H(4)   | 0.000  | 0.000  | 0.000  | 0.000  | 0.000 | 0.000  | 0.000  | 1.200  |
| H(5)   | 0.000  | 0.000  | 0.000  | 0.000  | 0.000 | 0.000  | 0.000  | 1.200  |
| H(6A)  | 0.018  | 0.000  | 0.000  | 0.000  | 0.000 | 0.000  | 0.000  | 1.200  |
| H(6B)  | 0.018  | 0.000  | 0.000  | 0.000  | 0.000 | 0.000  | 0.000  | 1.200  |
| H(7A)  | 0.016  | 0.000  | 0.000  | 0.000  | 0.000 | 0.000  | 0.000  | 1.200  |
| H(7B)  | 0.016  | 0.000  | 0.000  | 0.000  | 0.000 | 0.000  | 0.000  | 1.200  |
| H(8A)  | 0.016  | 0.000  | 0.000  | 0.000  | 0.000 | 0.000  | 0.000  | 1.200  |
| H(8B)  | 0.016  | 0.000  | 0.000  | 0.000  | 0.000 | 0.000  | 0.000  | 1.200  |
| H(9A)  | 0.016  | 0.000  | 0.000  | 0.000  | 0.000 | 0.000  | 0.000  | 1.200  |
| H(9B)  | 0.016  | 0.000  | 0.000  | 0.000  | 0.000 | 0.000  | 0.000  | 1.200  |
| H(9C)  | 0.016  | 0.000  | 0.000  | 0.000  | 0.000 | 0.000  | 0.000  | 1.200  |
| H(10A) | 0.017  | 0.000  | 0.000  | 0.000  | 0.000 | 0.000  | 0.000  | 1.200  |
| H(10B) | 0.017  | 0.000  | 0.000  | 0.000  | 0.000 | 0.000  | 0.000  | 1.200  |
| H(10C) | 0.017  | 0.000  | 0.000  | 0.000  | 0.000 | 0.000  | 0.000  | 1.200  |
| H(11A) | 0.023  | 0.000  | 0.000  | 0.000  | 0.000 | 0.000  | 0.000  | 1.200  |
| H(11B) | 0.023  | 0.000  | 0.000  | 0.000  | 0.000 | 0.000  | 0.000  | 1.200  |
| H(11C) | 0.023  | 0.000  | 0.000  | 0.000  | 0.000 | 0.000  | 0.000  | 1.200  |

Table I5. Hexadecapole Population Parameters.

| Atom   | H40    | H41+  | H41-  | H42+   | H42-   | H43+   | H43-  | H44+  | H44-   | Kappa' |
|--------|--------|-------|-------|--------|--------|--------|-------|-------|--------|--------|
| CL(1)  | 0.000  | 0.000 | 0.000 | 0.000  | 0.000  | 0.000  | 0.000 | 0.000 | 0.000  | 1.000  |
| N(1)   | 0.008  | 0.000 | 0.000 | 0.002  | -0.010 | 0.000  | 0.000 | 0.016 | -0.002 | 0.979  |
| N(3)   | 0.008  | 0.000 | 0.000 | 0.002  | -0.010 | 0.000  | 0.000 | 0.016 | -0.002 | 0.979  |
| C(2)   | -0.010 | 0.000 | 0.000 | -0.035 | 0.000  | 0.000  | 0.000 | 0.005 | 0.000  | 1.000  |
| C(4)   | 0.024  | 0.000 | 0.000 | -0.004 | -0.022 | 0.000  | 0.000 | 0.031 | -0.015 | 1.000  |
| C(5)   | 0.024  | 0.000 | 0.000 | -0.004 | -0.022 | 0.000  | 0.000 | 0.031 | -0.015 | 1.000  |
| C(6)   | 0.017  | 0.000 | 0.000 | -0.047 | 0.070  | 0.000  | 0.000 | 0.035 | 0.018  | 1.000  |
| C(7)   | -0.070 | 0.000 | 0.000 | 0.016  | 0.000  | 0.000  | 0.000 | 0.048 | 0.000  | 1.000  |
| C(8)   | -0.070 | 0.000 | 0.000 | 0.016  | 0.000  | 0.000  | 0.000 | 0.048 | 0.000  | 1.000  |
| C(9)   | 0.026  | 0.000 | 0.000 | 0.000  | 0.000  | -0.075 | 0.000 | 0.000 | 0.000  | 1.000  |
| C(10)  | 0.033  | 0.000 | 0.000 | 0.000  | 0.000  | 0.000  | 0.068 | 0.000 | 0.000  | 1.000  |
| C(11)  | 0.050  | 0.000 | 0.000 | 0.000  | 0.000  | 0.003  | 0.071 | 0.000 | 0.000  | 1.000  |
| H(4)   | 0.000  | 0.000 | 0.000 | 0.000  | 0.000  | 0.000  | 0.000 | 0.000 | 0.000  | 1.200  |
| H(5)   | 0.000  | 0.000 | 0.000 | 0.000  | 0.000  | 0.000  | 0.000 | 0.000 | 0.000  | 1.200  |
| H(6A)  | 0.000  | 0.000 | 0.000 | 0.000  | 0.000  | 0.000  | 0.000 | 0.000 | 0.000  | 1.200  |
| H(6B)  | 0.000  | 0.000 | 0.000 | 0.000  | 0.000  | 0.000  | 0.000 | 0.000 | 0.000  | 1.200  |
| H(7A)  | 0.000  | 0.000 | 0.000 | 0.000  | 0.000  | 0.000  | 0.000 | 0.000 | 0.000  | 1.200  |
| H(7B)  | 0.000  | 0.000 | 0.000 | 0.000  | 0.000  | 0.000  | 0.000 | 0.000 | 0.000  | 1.200  |
| H(8A)  | 0.000  | 0.000 | 0.000 | 0.000  | 0.000  | 0.000  | 0.000 | 0.000 | 0.000  | 1.200  |
| H(8B)  | 0.000  | 0.000 | 0.000 | 0.000  | 0.000  | 0.000  | 0.000 | 0.000 | 0.000  | 1.200  |
| H(9A)  | 0.004  | 0.000 | 0.000 | 0.000  | 0.000  | 0.000  | 0.000 | 0.000 | 0.000  | 1.200  |
| H(9B)  | 0.004  | 0.000 | 0.000 | 0.000  | 0.000  | 0.000  | 0.000 | 0.000 | 0.000  | 1.200  |
| H(9C)  | 0.004  | 0.000 | 0.000 | 0.000  | 0.000  | 0.000  | 0.000 | 0.000 | 0.000  | 1.200  |
| H(10A) | 0.000  | 0.000 | 0.000 | 0.000  | 0.000  | 0.000  | 0.000 | 0.000 | 0.000  | 1.200  |
| H(10B) | 0.000  | 0.000 | 0.000 | 0.000  | 0.000  | 0.000  | 0.000 | 0.000 | 0.000  | 1.200  |
| H(10C) | 0.000  | 0.000 | 0.000 | 0.000  | 0.000  | 0.000  | 0.000 | 0.000 | 0.000  | 1.200  |
| H(11A) | 0.006  | 0.000 | 0.000 | 0.000  | 0.000  | 0.000  | 0.000 | 0.000 | 0.000  | 1.200  |
| H(11B) | 0.006  | 0.000 | 0.000 | 0.000  | 0.000  | 0.000  | 0.000 | 0.000 | 0.000  | 1.200  |
| H(11C) | 0.006  | 0.000 | 0.000 | 0.000  | 0.000  | 0.000  | 0.000 | 0.000 | 0.000  | 1.200  |

\_atom\_local\_axes\_atom\_label

\_atom\_local\_axes\_atom0

\_atom\_local\_axes\_ax1

\_atom\_local\_axes\_atom1

\_atom\_local\_axes\_atom2

\_atom\_local\_axes\_ax2

|        |       |   |        |        |   |
|--------|-------|---|--------|--------|---|
| CL(1)  | N(1)  | X | CL(1)  | N(3)   | Y |
| N(1)   | C(2)  | X | N(1)   | C(6)   | Y |
| N(3)   | C(2)  | X | N(3)   | C(11)  | Y |
| C(2)   | C(10) | Z | C(2)   | N(3)   | Y |
| C(4)   | N(3)  | X | C(4)   | C(5)   | Y |
| C(5)   | N(1)  | X | C(5)   | C(4)   | Y |
| C(6)   | N(1)  | X | C(6)   | C(7)   | Y |
| C(7)   | DUM0  | Z | C(7)   | C(8)   | Y |
| C(8)   | DUM1  | Z | C(8)   | C(9)   | Y |
| C(9)   | C(8)  | Z | C(9)   | H(9C)  | X |
| C(10)  | C(2)  | Z | C(10)  | H(10C) | Y |
| C(11)  | N(3)  | Z | C(11)  | H(11C) | Y |
| H(4)   | C(4)  | Z | H(4)   | C(5)   | Y |
| H(5)   | C(5)  | Z | H(5)   | C(4)   | Y |
| H(6A)  | C(6)  | Z | H(6A)  | H(6B)  | Y |
| H(6B)  | C(6)  | Z | H(6B)  | H(6A)  | Y |
| H(7A)  | C(7)  | Z | H(7A)  | H(7B)  | Y |
| H(7B)  | C(7)  | Z | H(7B)  | H(7A)  | Y |
| H(8A)  | C(8)  | Z | H(8A)  | H(8B)  | Y |
| H(8B)  | C(8)  | Z | H(8B)  | H(8A)  | Y |
| H(9A)  | C(9)  | Z | H(9A)  | H(9B)  | Y |
| H(9B)  | C(9)  | Z | H(9B)  | H(9A)  | Y |
| H(9C)  | C(9)  | Z | H(9C)  | H(9A)  | Y |
| H(10A) | C(10) | Z | H(10A) | C(2)   | Y |
| H(10B) | C(10) | Z | H(10B) | C(2)   | Y |
| H(10C) | C(10) | Z | H(10C) | C(2)   | Y |
| H(11A) | C(11) | Z | H(11A) | H(11B) | Y |
| H(11B) | C(11) | Z | H(11B) | H(11A) | Y |
| H(11C) | C(11) | Z | H(11C) | H(11A) | Y |



| _atom_site_label | _atom_site_fract_x | _atom_site_fract_y | _atom_site_fract_z | _atom_site_occupancy | _atom_site_symmetry_multiplicity | _atom_site_U_iso_or_equiv |
|------------------|--------------------|--------------------|--------------------|----------------------|----------------------------------|---------------------------|
| CL(1)            | 0.065486(15)       | 0.208793(9)        | 0.269013(11)       | 1                    | 4                                | 0.033                     |
| N(1)             | 0.60919(4)         | 0.04373(3)         | 0.35300(3)         | 1                    | 4                                | 0.025                     |
| N(3)             | 0.76282(4)         | 0.04419(3)         | 0.51688(3)         | 1                    | 4                                | 0.022                     |
| C(2)             | 0.68702(5)         | 0.11187(3)         | 0.43419(4)         | 1                    | 4                                | 0.023                     |
| C(4)             | 0.73321(5)         | -0.06890(3)        | 0.48774(4)         | 1                    | 4                                | 0.025                     |
| C(5)             | 0.63662(5)         | -0.06923(3)        | 0.38456(4)         | 1                    | 4                                | 0.026                     |
| C(6)             | 0.51112(6)         | 0.08278(4)         | 0.24608(5)         | 1                    | 4                                | 0.033                     |
| C(7)             | 0.61409(6)         | 0.12604(4)         | 0.13927(4)         | 1                    | 4                                | 0.028                     |
| C(8)             | 0.71502(6)         | 0.03249(4)         | 0.07969(4)         | 1                    | 4                                | 0.029                     |
| C(9)             | 0.81275(7)         | 0.07840(5)         | -0.02804(5)        | 1                    | 4                                | 0.043                     |
| C(10)            | 0.69197(6)         | 0.23852(4)         | 0.43508(5)         | 1                    | 4                                | 0.033                     |
| C(11)            | 0.86062(6)         | 0.08506(4)         | 0.62237(4)         | 1                    | 4                                | 0.030                     |
| H(4)             | 0.776944           | -0.138202          | 0.546172           | 1                    | 4                                | 0.037                     |
| H(5)             | 0.586909           | -0.140785          | 0.332585           | 1                    | 4                                | 0.041                     |
| H(6A)            | 0.423528           | 0.145535           | 0.277924           | 1                    | 4                                | 0.044                     |
| H(6B)            | 0.43982            | 0.009507           | 0.214958           | 1                    | 4                                | 0.045                     |
| H(7A)            | 0.693241           | 0.193818           | 0.174507           | 1                    | 4                                | 0.046                     |
| H(7B)            | 0.533985           | 0.162659           | 0.068069           | 1                    | 4                                | 0.050                     |
| H(8A)            | 0.795317           | -0.005262          | 0.150045           | 1                    | 4                                | 0.044                     |
| H(8B)            | 0.634085           | -0.036475          | 0.050186           | 1                    | 4                                | 0.050                     |
| H(9A)            | 0.873647           | 0.00978            | -0.077949          | 1                    | 4                                | 0.061                     |
| H(9B)            | 0.901614           | 0.140147           | 0.005829           | 1                    | 4                                | 0.058                     |
| H(9C)            | 0.733914           | 0.124222           | -0.093105          | 1                    | 4                                | 0.064                     |
| H(10A)           | 0.597375           | 0.271368           | 0.373746           | 1                    | 4                                | 0.050                     |
| H(10B)           | 0.807906           | 0.264906           | 0.398752           | 1                    | 4                                | 0.050                     |
| H(10C)           | 0.673444           | 0.266552           | 0.530752           | 1                    | 4                                | 0.051                     |
| H(11A)           | 0.788901           | 0.144586           | 0.677292           | 1                    | 4                                | 0.051                     |
| H(11B)           | 0.898656           | 0.011322           | 0.678123           | 1                    | 4                                | 0.047                     |
| H(11C)           | 0.965625           | 0.128652           | 0.584649           | 1                    | 4                                | 0.047                     |

\_atom\_dummy\_label  
\_atom\_dummy\_fract\_x  
\_atom\_dummy\_fract\_y  
\_atom\_dummy\_fract\_z  
DUM0 0.612902 0.044379 0.167476  
DUM1 0.71329 0.11411 0.051563

-----  
\_atom\_site\_aniso\_label  
\_atom\_site\_aniso\_U\_11  
\_atom\_site\_aniso\_U\_22  
\_atom\_site\_aniso\_U\_33  
\_atom\_site\_aniso\_U\_12  
\_atom\_site\_aniso\_U\_13  
\_atom\_site\_aniso\_U\_23  
CL(1) 0.03455(6) 0.02996(5) 0.03447(6) 0.00328(4) -0.00391(4) 0.00810(4)  
N(1) 0.02278(16) 0.02613(15) 0.02478(17) -0.00070(11) 0.00176(12) -0.00013(12)  
N(3) 0.02221(15) 0.02111(14) 0.02387(16) -0.00105(10) 0.00298(12) -0.00088(12)  
C(2) 0.02411(18) 0.01971(15) 0.02546(18) 0.00105(12) 0.00382(13) -0.00068(13)  
C(4) 0.0285(2) 0.02086(17) 0.02616(19) -0.00186(13) 0.00299(15) 0.00095(14)  
C(5) 0.0283(2) 0.02389(18) 0.0272(2) -0.00558(13) 0.00266(16) -0.00186(14)  
C(6) 0.0250(2) 0.0427(3) 0.0305(2) 0.00444(17) -0.00193(17) 0.00073(19)  
C(7) 0.0333(2) 0.02553(19) 0.0257(2) 0.00407(14) -0.00276(17) 0.00107(15)  
C(8) 0.0324(2) 0.0278(2) 0.0272(2) 0.00466(15) -0.00158(17) 0.00102(16)  
C(9) 0.0445(3) 0.0557(3) 0.0282(2) 0.0080(2) 0.0047(2) 0.0064(2)  
C(10) 0.0441(3) 0.02065(18) 0.0342(2) 0.00466(16) 0.0058(2) -0.00146(16)  
C(11) 0.0295(2) 0.0313(2) 0.0293(2) -0.00167(15) -0.00255(17) -0.00395(17)  
H(4) 0.036455 0.032985 0.042856 -0.001231 -0.001072 0.008663  
H(5) 0.042193 0.031882 0.049019 -0.005965 -0.007066 -0.005171  
H(6A) 0.047788 0.041119 0.043307 0.009697 0.002366 0.001479  
H(6B) 0.050265 0.040493 0.044711 -0.006847 -0.006973 -0.002481  
H(7A) 0.04914 0.041573 0.048065 -0.004241 0.002991 -0.000047  
H(7B) 0.052865 0.059431 0.039099 0.010918 -0.003507 0.008819  
H(8A) 0.048207 0.047743 0.035564 0.005828 -0.002039 0.003192  
H(8B) 0.05305 0.052668 0.045031 -0.002967 -0.002385 -0.010096  
H(9A) 0.075286 0.06284 0.046669 0.016715 0.015224 -0.000205  
H(9B) 0.063305 0.062191 0.047385 -0.006556 0.005627 0.007446

H(9C) 0.062548 0.084529 0.045194 0.019458 0.000153 0.020779  
H(10A) 0.051644 0.039365 0.05949 0.004876 -0.013715 0.003113  
H(10B) 0.043531 0.035945 0.071211 -0.002729 0.011547 -0.000036  
H(10C) 0.068493 0.042279 0.043423 0.003667 0.003789 -0.009953  
H(11A) 0.046161 0.05726 0.049036 0.014414 -0.000124 -0.019827  
H(11B) 0.053278 0.041408 0.04473 0.003043 -0.007504 0.004109  
H(11C) 0.043217 0.050876 0.046979 -0.013294 0.004116 -0.003791

---

Differences of Mean-Squares Displacement Amplitudes (DMSDA) (1.E4 A\*\*2) along the bonds

| ATOM-->ATOM | /     | DIST   | DMSDA | ATOM | /      | DIST | DMSDA | ATOM   | / | DIST | DMSDA |
|-------------|-------|--------|-------|------|--------|------|-------|--------|---|------|-------|
| N(1)        | C(2)  | 1.3398 | 1     | C(5) | 1.3799 | 6    | C(6)  | 1.4706 | 4 |      |       |
| N(3)        | C(2)  | 1.3391 | -2    | C(4) | 1.3784 | 6    | C(11) | 1.4643 | 1 |      |       |
| C(2)        | C(10) | 1.4795 | 11    |      |        |      |       |        |   |      |       |
| C(4)        | C(5)  | 1.3586 | 3     |      |        |      |       |        |   |      |       |
| C(6)        | C(7)  | 1.5237 | -15   |      |        |      |       |        |   |      |       |
| C(7)        | C(8)  | 1.5226 | 1     |      |        |      |       |        |   |      |       |
| C(8)        | C(9)  | 1.5175 | 7     |      |        |      |       |        |   |      |       |

---

data\_FFT

\_refine\_diff\_density\_max 0.183  
\_refine\_diff\_density\_min -0.263  
\_refine\_diff\_density\_rms 0.026

---

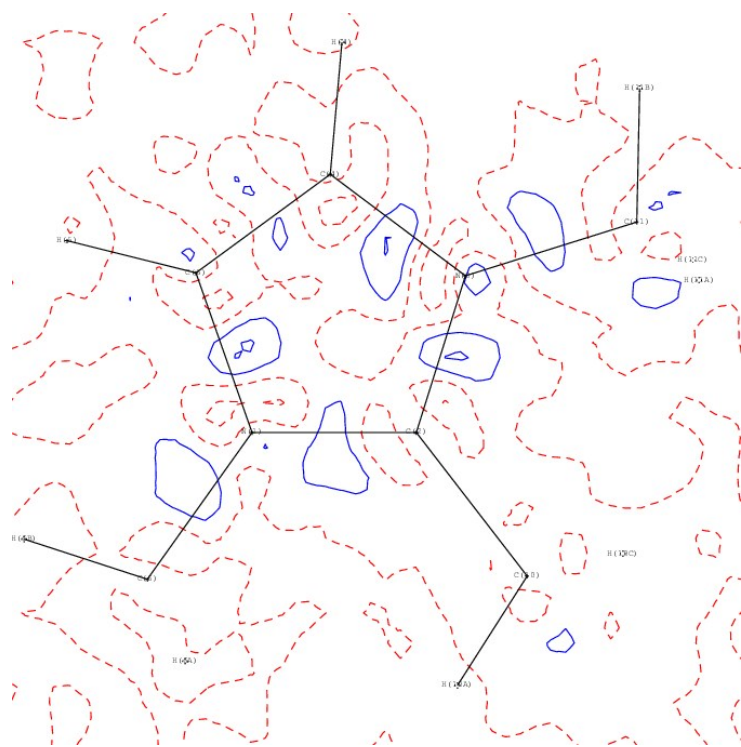

Figure I1. Residual electron density map in the plane of the imidazolium core of the cation. Contours are drawn with  $0.1 \text{ e}\text{\AA}^{-3}$  step, zero and negative ones are dashed.
